# Supplementary material for: Design of controlled multi-probe coupled assay via bioinspired signal amplification approach for mercury detection
Source: Royal Society of Chemistry journal article supplement (doi:10.1039/c6ra11735j), 2016-01-01
Supplement: c6ra11735j1.pdf [file c6ra11735j1.pdf]

## Supplementary Information

### **Design of Controlled Multi-Probes Coupled Assay via Bioinspired Signal Amplification Approach for Mercury Detection**

**Ahmad Zaki Mubarak,<sup>a,c</sup> Szu-Ting Lin,<sup>a</sup> Veerappan Mani<sup>a,b</sup>, Chih-Hung Huang<sup>a</sup> and Sheng-Tung Huang<sup>\*a,b</sup>**

<sup>a</sup>Graduate Institute of Biomedical and Biochemical Engineering, National Taipei University of Technology, Taipei, Taiwan (ROC). E-mail: [ws75624@ntut.edu.tw](mailto:ws75624@ntut.edu.tw); Fax: +886 02 2731 7117; Tel: +886 2271 2171 2525

<sup>b</sup>Department of Chemical Engineering and Biotechnology, National Taipei University of Technology, Taipei, Taiwan (ROC)

<sup>c</sup>Biotechnology, Department of Agricultural Product Technology, University of Brawijaya, Malang, Indonesia

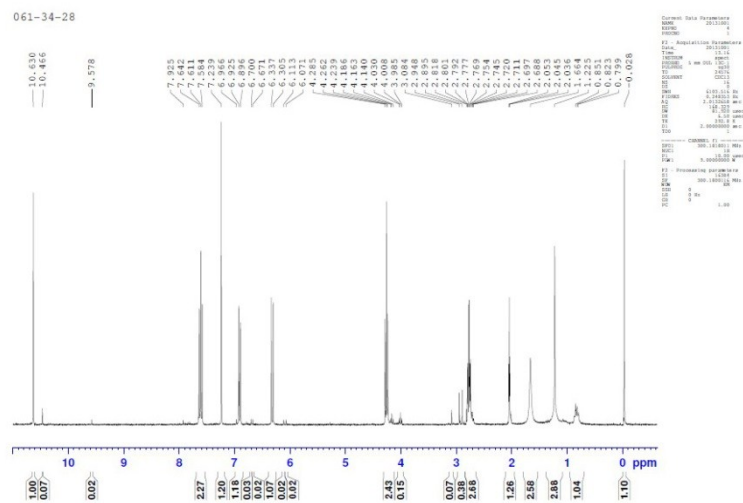

**Fig. S1.**  $^1\text{H}$  NMR spectrum of compound 2

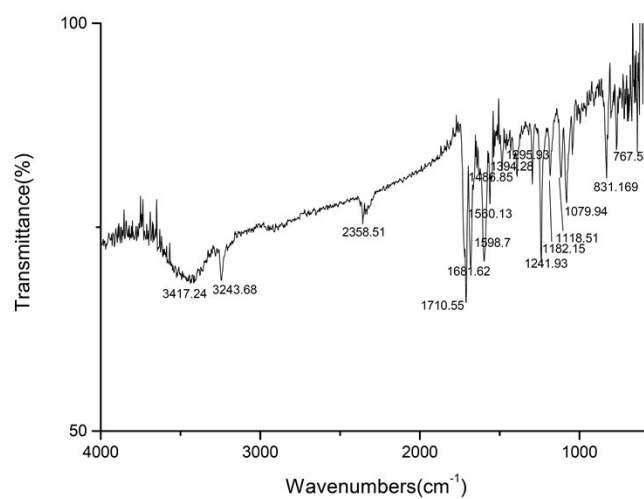

**Fig. S2.** IR spectrum of compound 2

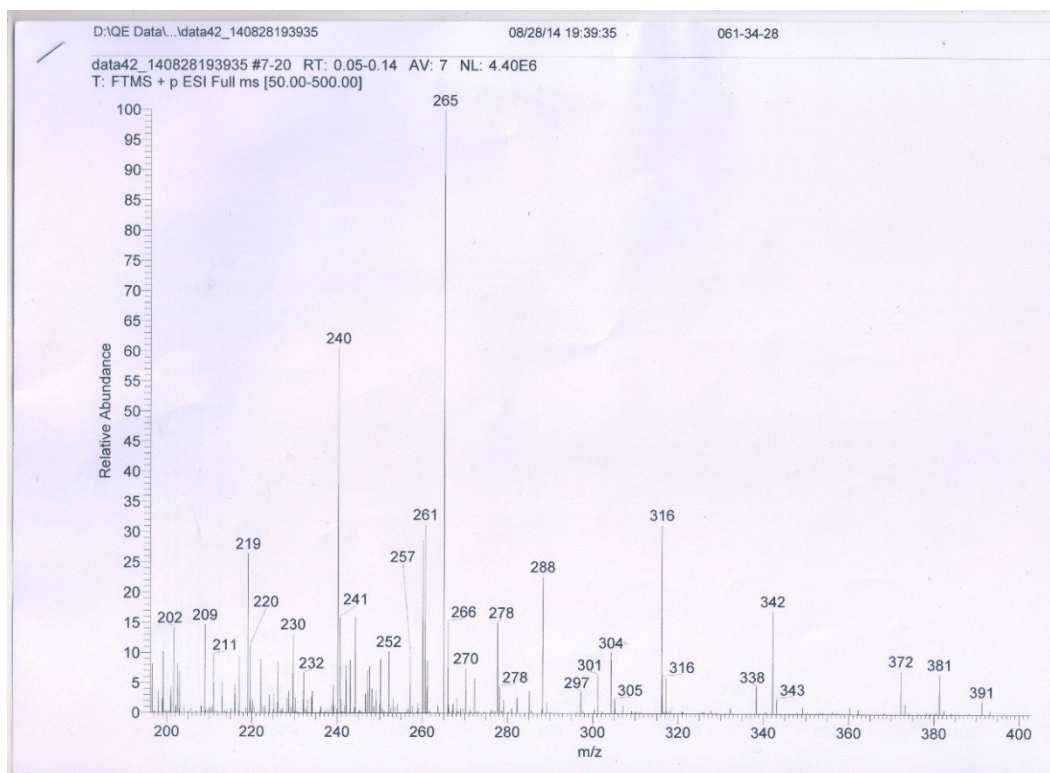

**Fig. S3.** Mass spectrum (ESI+) of compound 2

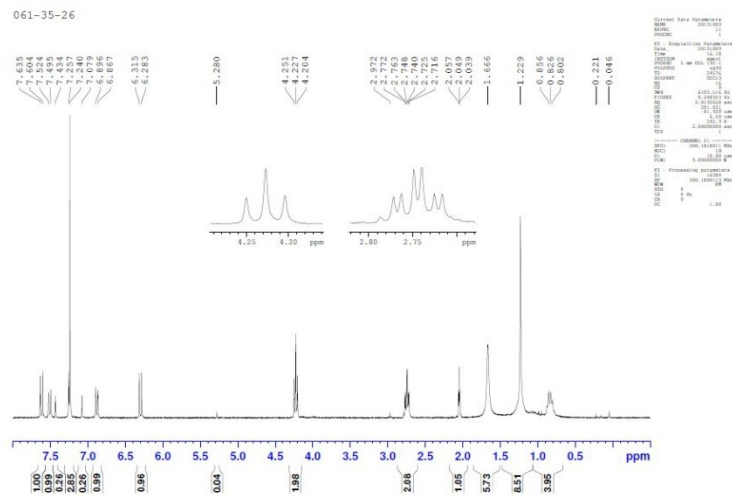

**Fig. S4.**  $^1\text{H}$  NMR spectrum of AYF

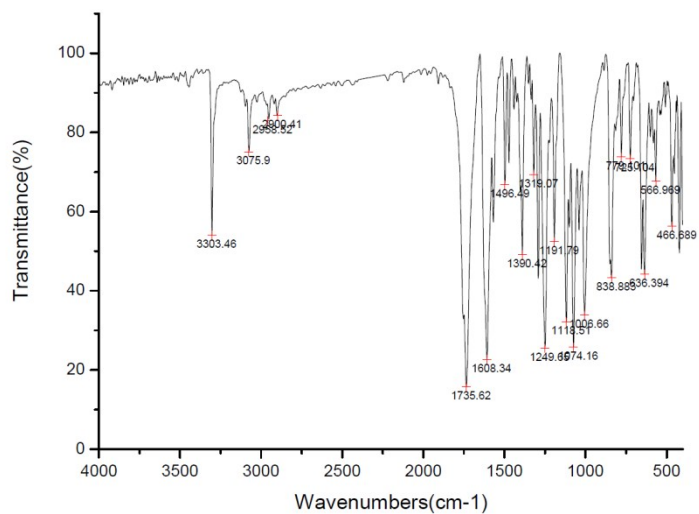

**Fig. S5.** IR spectrum of AYF

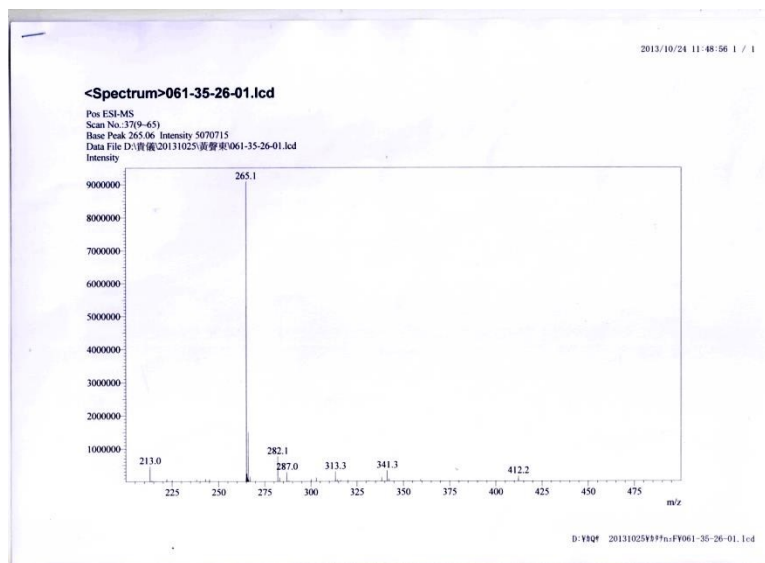

**Fig. S6.** Mass spectrum (ESI+) of AYF

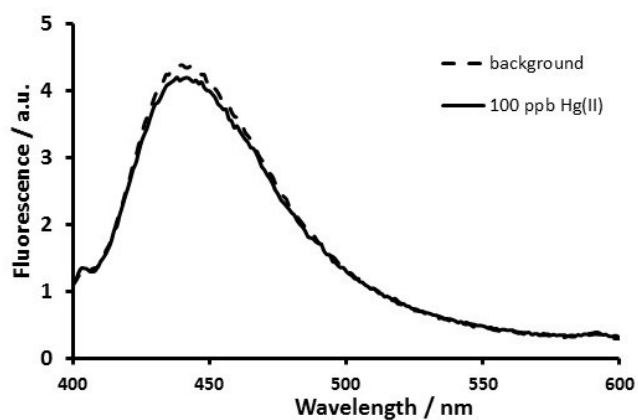

**Fig. S7.** Negative control of DPF<sub>1</sub>. Fluorescence emission changes ( $\lambda_{\text{ex}}=360$  nm) consisting of DPF<sub>1</sub> (50  $\mu\text{M}$ ) upon incubation with and without the present of Hg<sup>2+</sup> in 1% CBTP buffer (pH=7.1, 1 mM), 9% DMSO, 1% of Pyridine and 89% ACN for 3 h at 40°C.

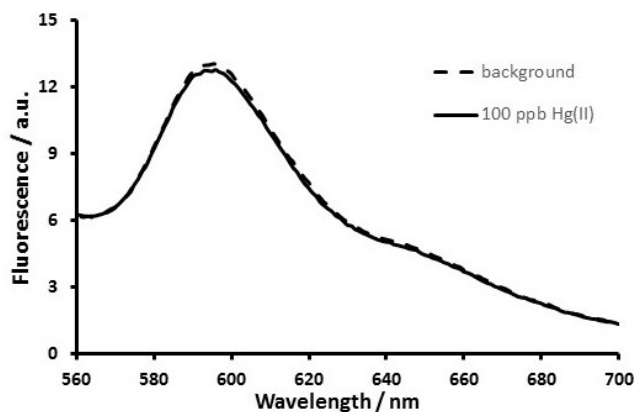

**Fig. S8.** Negative control of DCC. Fluorescence emission changes ( $\lambda_{\text{ex}}=500$  nm) consisting of DCC (20  $\mu\text{M}$ ) upon incubation with and without the present of  $\text{Hg}^{2+}$  in 1% CBTP buffer (pH=7.1, 1 mM), 9% DMSO, 1% of Pyridine and 89% ACN for 3 h at 40°C.

### Preparation of tap water and bovine serum samples

Tap water (90  $\mu\text{L}$ ) were spiked with 10  $\mu\text{L}$  0.1 M CBTP pH=7.1 with known quantities of  $\text{Hg}^{2+}$ . The final concentrations of spiked  $\text{Hg}^{2+}$  are 10 ppb and 40 ppb. 5  $\mu\text{L}$  of this mixed solution was then used for quantification of  $\text{Hg}^{2+}$  (total volume of the sample assay for the 1<sup>st</sup> step is 100  $\mu\text{L}$ ). Calculated amount of  $\text{Hg}^{2+}$  in final experimental medium is from first step which adds the dilution factor of 20.

Bovine serum (45  $\mu\text{L}$ ) were spiked with 5  $\mu\text{L}$   $\text{H}_2\text{O}$  with known quantities of  $\text{Hg}^{2+}$  (1 ppm and 1.5 ppm), then the spiked bovine samples were dissolved in 0.1 M CBTP pH=7.1 (450  $\mu\text{L}$ ). The final concentrations of  $\text{Hg}^{2+}$  in bovine sample are 100 ppb and 150 ppb. 5  $\mu\text{L}$  of this mixed solution was then used for quantification of  $\text{Hg}^{2+}$  (total volume of the sample assay for the 1<sup>st</sup> step is 100  $\mu\text{L}$ ). Calculated amount of  $\text{Hg}^{2+}$  in final experimental medium is from first step which adds the dilution factor of 200.

The linear range curve with emission intensity and  $\text{Hg}^{2+}$  concentration (Figure 3) plays the key role in this calculation. Final emission intensity was noted after completing real sample application with three probes assay. With reverse procedure, we can quantitatively estimate the amount of  $\text{Hg}^{2+}$  concentration in simple volumetric calculation.
